# Supplementary material for: Visual detection of dopamine and monitoring tyrosinase activity using a pyrocatechol violet–Sn4+ complex
Source: Royal Society of Chemistry journal article supplement (doi:10.1039/c1cc15587c), 2011-01-01
Supplement: c1cc15587c.pdf [file c1cc15587c.pdf]

# Visual Detection of Catecholamines and Monitoring Tyrosinase Activity Using Pyrocatechol Violet-Sn<sup>4+</sup> Complex

Qingling Xu and Juyoung Yoon<sup>□\*</sup>

\*Department of Chemistry and Nano Science, Ewha Womans University, Seoul  
120-750, Korea

\*Department of Bioinspired Science (WCU), Ewha Womans University, Seoul  
120-750, Korea  
[jyoon@ewha.ac.kr](mailto:jyoon@ewha.ac.kr)

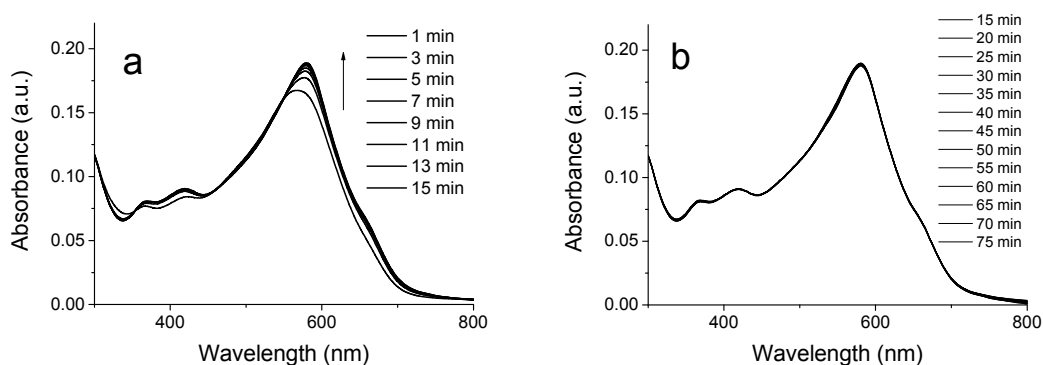

Fig. 1 UV/vis Spectra of PCV-Sn<sup>4+</sup> mixture at pH 7.4 in 20 mM HEPES buffer as a function of time. The concentration of PCV and Sn<sup>4+</sup> were 10  $\mu$ M and 5  $\mu$ M.

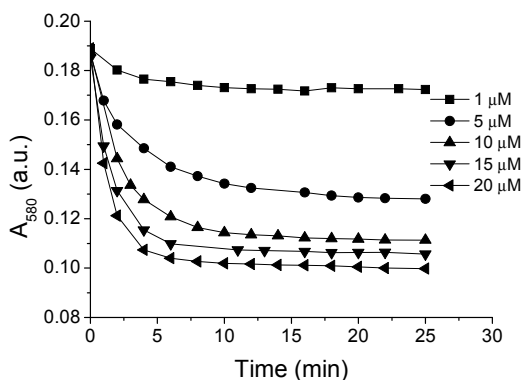

Fig. 2 Absorbance of PCV-Sn<sup>4+</sup> mixture at 580 nm over an incubation time of 25 min at varied concentrations of dopamine in HEPES buffer (pH 7.4, 20 mM). The concentration of PCV and Sn<sup>4+</sup> were 10  $\mu$ M and 5  $\mu$ M.

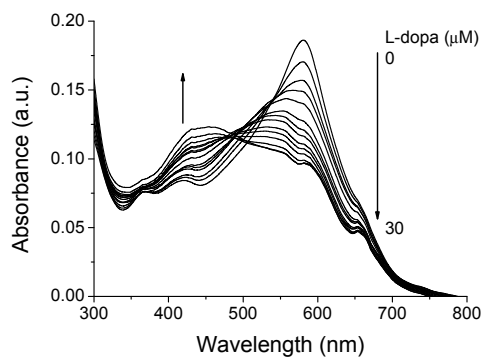

Fig. 3 UV/vis spectra of PCV-Sn<sup>4+</sup> mixture in the presence of added L-dopa (0 μM, 1 μM, 2 μM, 3 μM, 4 μM, 6 μM, 8 μM, 10 μM, 10 μM, 12 μM, 14 μM, 16 μM, 20 μM, 25 μM, 30 μM) in HEPES buffer (pH 7.4, 20 mM). The concentration of PCV and Sn<sup>4+</sup> were 10 μM and 5 μM.

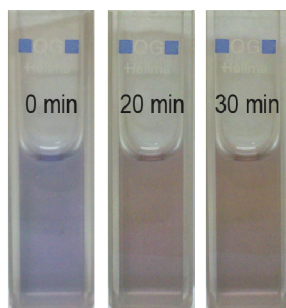

Scheme 1 photographs of tyrosinase activity assay at 25 °C using PCV-Sn<sup>4+</sup> mixture in the presence of L-tyrosine (50 μM). The concentration of PCV and Sn<sup>4+</sup> were 10 μM and 5 μM. The concentration of tyrosinase is 4.0 U/mL.
